# Supplementary material for: Managing Reliability and Stability Risks in Forest Harvesting
Source: Atypon-hosted journal article supplement (doi:10.1287/msom.2017.0626), 2017-08-10
Supplement: msom.2017.0626-sm.pdf [file msom.2017.0626-sm.pdf]

# Managing Reliability and Stability Risks in Forest Harvesting

Miguel A. Lejeune\*, Janne Kettunen†

## Appendix

### A.1 Proof of Theorem 4

**Proof.** a) Let  $(\hat{x}, \hat{\lambda})$  be a feasible solution for (17)-(19). It follows from Theorem 3 that:

$G = \left\{ \omega^k \in \bar{\Omega} : \sum_{j \in J} \sum_{l=1}^{n_j} \hat{\lambda}_{j,l} \beta_{j,l}^k = |J| \right\} \subseteq \bar{\Omega}^+$ . Let  $L = \{(j, l) : \hat{\lambda}_{j,l} = 1, j \in J, l = 1, \dots, n_j\}$ . From (15),  $\omega_j^k \geq \sum_{r=1}^{n_j} \hat{\lambda}_{j,r} c_{j,r} = c_{j,l}, (j, l) \in L, \omega^k \in G$ . Further, the construction of  $C$  (16) implies that one can always find  $\omega^{k'} \in G$  such that:

$$\omega_j^{k'} = c_{j,l} \quad (j, l) \in L. \quad (1)$$

Since  $\omega^{k'} \in G \subseteq \bar{\Omega}_B^+$ , we have  $\mathbb{P}(\xi \leq \omega^{k'}) \geq p$ , and

$$\mathbb{P}\left(\sum_{j \in J} x_{i,t} \xi_j \leq \sum_{j \in J} x_{i,t} \omega_j^{k'}, i \in I\right) \geq p. \quad (2)$$

Therefore,

$$\sum_{j \in J} \omega_j^{k'} x_{i,t} \leq -d_i, i \in I \quad \Rightarrow \quad \mathbb{P}\left(\sum_{j \in J} \xi_j x_{i,t} \leq -d_i, i \in I\right) \geq p. \quad (3)$$

Combining (1) and (3) gives:

$$\sum_{j \in J} x_{i,t} \left( \sum_{l=1}^{n_j} \hat{\lambda}_{j,l} c_{j,l} \right) \leq -d_i, i \in I \quad \Rightarrow \quad (13) \text{ holds.} \quad (4)$$

This demonstrates that any solution  $(\hat{x}, \hat{\lambda})$  feasible for **SL1** is also feasible for (13).

b) Any feasible solution  $(\hat{x}, \hat{d})$  for (13) is feasible for **SL1**. As (13) permits to rewrite any  $p$ -sufficient recombination  $\omega^k \in \bar{\Omega}^+$  as  $\omega^k = [\omega_1^k, \dots, \omega_j^k, \dots, \omega_{|J|}^k] = [\sum_{l=1}^{n_1} \hat{\lambda}_{1,l} c_{1,l}, \dots, \sum_{l=1}^{n_j} \hat{\lambda}_{j,l} c_{j,l}, \dots, \sum_{l=1}^{n_{|J|}} \hat{\lambda}_{|J|,l} c_{|J|,l}]$ , we have to show that there always exists a  $p$ -sufficient recombination  $\omega^k \in \bar{\Omega}^+$  for which  $(\hat{x}, \hat{d})$  is feasible.

The set partitioning constraints (4) imply that any feasible solution is such that for any  $i \in I$  one of the  $|T|$  variables  $x_{i,t}$  takes value 1 and all the other are equal to 0. Let  $j_i^* = (i, t^*)$  and  $\hat{x}_{i,t^*}$  denote the variable taking value 1. The constraint (13) becomes  $\mathbb{P}(\xi_{j_i^*} \leq -d_i, i \in I) \geq p$ , which holds true if  $\omega_{j_i^*}^k \leq -d_i, i \in I$  ( $j = (i, t)$ ) and  $\mathbb{P}(\xi_{j_i^*} \leq \omega_{j_i^*}^k, i \in I) \geq p$ . This can only be the case if  $\omega^k \in \bar{\Omega}^+$  and any solution feasible for (13) satisfies the conditions of at least one  $p$ -sufficient recombination.

\*George Washington University, Washington, DC, USA; mlejeune@gwu.edu.

†George Washington University, Washington, DC, USA; jkettune@gwu.edu.

Combining a) and b) shows that the probabilistic constraint (13) is equivalent to the system **SL1** of mixed-integer quadratic inequalities

$$\sum_{t \in T} x_{i,t} \left( \sum_{l=1}^{n_j} \lambda_{j,l} c_{j,l} \right) \leq -d_i, \quad i \in I. \quad (5)$$

c) We use the Fortet inequalities to demonstrate the equivalence of the feasible sets respectively defined by (5) and (20)-(24). The Fortet inequalities linearize the binary bilinear terms  $x_{i,t}\lambda_{j,l}$  in (5) by lifting: i) the decisional space by adding the auxiliary decision variables  $z_{j,l}, j \in J, l = 1, \dots, n_j$  and ii) the constraint space by adding four sets of linear constraints of form (20)-(23) for each bilinear term  $x_{i,t}\lambda_{j,l}$ , which guarantee that  $z_{j,l} = x_{i,t}\lambda_{j,l}$ . The constraints (20), (21), and (23) guarantee that  $z_{j,l}$  is equal to 0 if  $x_{i,t}$  or  $\lambda_{j,l}$  is equal to 0, while (22) sets  $z_{j,l}$  to 1 if both  $x_{i,t}$  and  $\lambda_{j,l}$  are both equal to 1. The Fortet inequalities allow us to transition from a set of mixed-integer quadratic inequalities to one with mixed-integer linear inequalities and to obtain the result that we set out to prove.  $\square$

## A.2 Proof of Proposition 7

**Proof.** The inequalities (20)-(23) guarantee that  $z_{j,l} = \lambda_{j,l}x_{i,t}, l = 1, \dots, n_j, j = (i, t) \in J$ . Removing (20) does not ensure that  $z_{j,l} = 0$  if  $\lambda_{j,l} = 1$  and  $x_{i,t} = 0, j = (i, t)$ . The introduction of the new constraints (25) will compensate for that. Indeed, the combination of (18) and (25) ensures that exactly one of the  $n_j$  variables  $z_{j,l}$  is equal to one. The only variable  $z_{j,l}$  taking value one must be the one for which both  $\lambda_{j,l} = 1$  and  $x_{i,t} = 1, j = (i, t)$ . Thus, this precludes  $z_{j,l} = 1$  when  $\lambda_{j,l} = 1$  and  $x_{i,t} = 0, j = (i, t)$ . As the inequalities (25) do not cut any integer solution feasible for (20), they are valid and stronger than (20).  $\square$

## A.3 Proof of Proposition 8

**Proof.** Problem **M1** maximizes the sum of the non-negative variables  $d_i$ , which are upper-bounded by (24) in **SL1**. Each parameter  $c_{j,l}, j \in J, l = 1, \dots, n_j$  is negative as each  $c_{j,l}$  represents a negative profit, see (15). Hence,  $d_i$  grows larger as  $z_{j,l}$  increases. It follows that each  $z_{j,l}$  will systematically take value 1 if allowed by (20) and (21). Thus, the constraints (22), which lower bounds the variables  $z_{j,l}$ , are superfluous and can be removed. The replacement of (20) by (25) is due to Lemma 7.  $\square$

## A.4 Trade-Off Between Stability and Reliability Requirements

We cross-validate the managerial guidelines presented in Section 5.3 for the cases when (i) scenarios are generated from historical data and from a mixture of plausible future market conditions, (ii) the planning

horizon comprises  $|T| = 10, 8$  periods, and (iii) the reliability level  $p$  is set to 0.99, 0.95, and 0.9. Results in Figures 1 and 2 and Tables 1 and 2 are obtained from experiments using 5000 scenarios.

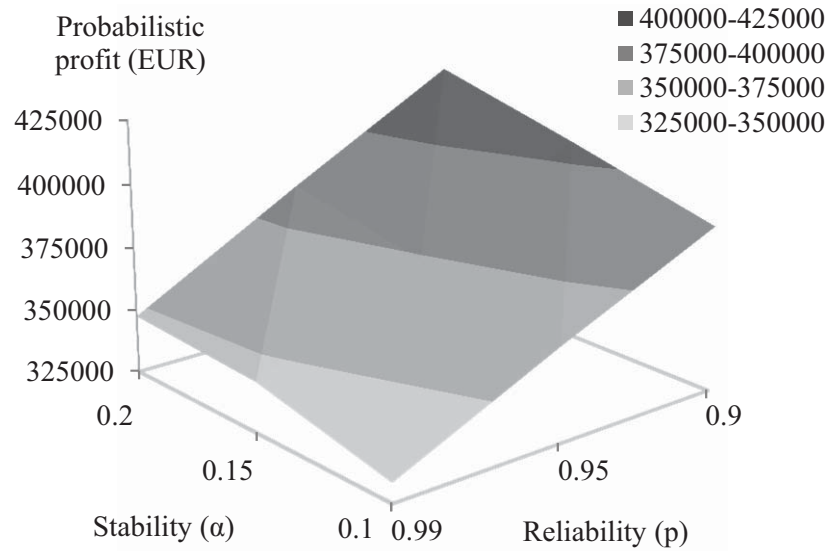

Figure 1: Tradeoffs among stability and reliability in 10-period problem using a mixture of scenarios

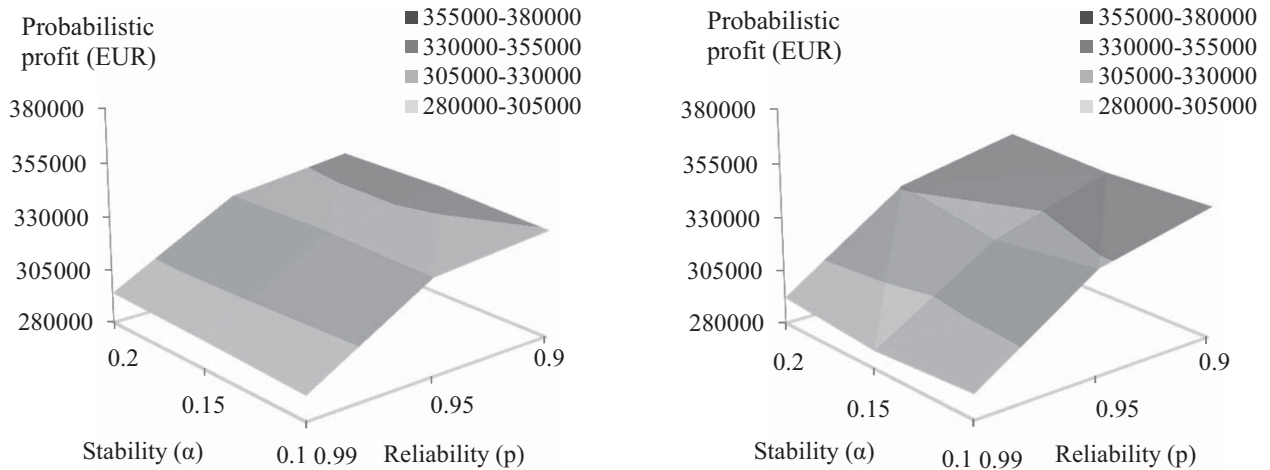

Figure 2: Tradeoffs among stability and reliability in 8-period problem, left: historical scenarios, right: mixture of scenarios

Table 1: Impact of increasing profit stability requirement on the number of stands harvested at early periods (periods 1-5 when  $|T| = 10$  and periods 1-4 when  $|T| = 8$ )

| $ T $   | Scenarios  | $p$  | Number of stands harvested during early periods |              |              | Similar to observed result |
|---------|------------|------|-------------------------------------------------|--------------|--------------|----------------------------|
|         |            |      | No stability constraint                         | $\alpha=0.2$ | $\alpha=0.1$ |                            |
| 10      | Historical | 0.99 | 5                                               | 21           | 25           | ✓                          |
|         |            | 0.95 | 5                                               | 24           | 27           | ✓                          |
|         |            | 0.9  | 5                                               | 23           | 23           | ✓                          |
|         | Mixed      | 0.99 | 5                                               | 22           | 28           | ✓                          |
|         |            | 0.95 | 5                                               | 25           | 25           | ✓                          |
|         |            | 0.9  | 5                                               | 21           | 23           | ✓                          |
| 8       | Historical | 0.99 | 5                                               | 13           | 25           | ✓                          |
|         |            | 0.95 | 4                                               | 14           | 19           | ✓                          |
|         |            | 0.9  | 4                                               | 19           | 22           | ✓                          |
|         | Mixed      | 0.99 | 8                                               | 16           | 20           | ✓                          |
|         |            | 0.95 | 4                                               | 19           | 23           | ✓                          |
|         |            | 0.9  | 4                                               | 19           | 20           | ✓                          |
| Average |            |      | 4.92                                            | 19.67        | 23.33        | ✓                          |

Table 2: Impact of increasing profit stability requirement on the correlation between optimal harvesting times and growth rates (of main tree species) of stands

| $ T $   | Scenarios  | $p$  | Correlation             |              |              | Similar to observed result |
|---------|------------|------|-------------------------|--------------|--------------|----------------------------|
|         |            |      | No stability constraint | $\alpha=0.2$ | $\alpha=0.1$ |                            |
| 10      | Historical | 0.99 | 0.15                    | 0.43         | 0.51         | ✓                          |
|         |            | 0.95 | 0.14                    | 0.45         | 0.51         | ✓                          |
|         |            | 0.9  | 0.12                    | 0.43         | 0.52         | ✓                          |
|         | Mixed      | 0.99 | 0.17                    | 0.41         | 0.50         | ✓                          |
|         |            | 0.95 | 0.09                    | 0.47         | 0.55         | ✓                          |
|         |            | 0.9  | 0.08                    | 0.44         | 0.45         | ✓                          |
| 8       | Historical | 0.99 | 0.21                    | 0.25         | 0.41         | ✓                          |
|         |            | 0.95 | 0.08                    | 0.29         | 0.36         | ✓                          |
|         |            | 0.9  | 0.16                    | 0.34         | 0.36         | ✓                          |
|         | Mixed      | 0.99 | 0.26                    | 0.33         | 0.37         | ✓                          |
|         |            | 0.95 | 0.07                    | 0.30         | 0.36         | ✓                          |
|         |            | 0.9  | 0.19                    | 0.28         | 0.35         | ✓                          |
| Average |            |      | 0.14                    | 0.37         | 0.44         | ✓                          |
